# Supplementary material for: Folic-Acid-Conjugated Thermoresponsive Polymeric Particles for Targeted Delivery of 5-Fluorouracil to CRC Cells
Source: MDPI journal article supplement (doi:10.3390/ijms24021364), 2023-01-10
Supplement: s1 [file s1]

# Folic-Acid-Conjugated Thermoresponsive Polymeric Particles for Targeted Delivery of 5-Fluorouracil to CRC Cells

Sylvia Milewska <sup>1,2,†</sup>, Gabriela Siemiaszko <sup>3,†</sup>, Agnieszka Zofia Wilczewska <sup>3</sup>, Iwona Misztalewska-Turkowicz <sup>3</sup>, Karolina Halina Markiewicz <sup>3</sup>, Dawid Szymczuk <sup>3,4</sup>, Diana Sawicka <sup>1</sup>, Halina Car <sup>1</sup>, Ryszard Lazny <sup>3</sup> and Katarzyna Niemirowicz-Laskowska <sup>1,\*</sup>

<sup>1</sup> Department of Experimental Pharmacology, Medical University of Bialystok, Szpitalna 37, 15-361 Bialystok, Poland

<sup>2</sup> Doctoral School, Medical University of Bialystok, Kilinskiego 1, 15-089 Bialystok, Poland

<sup>3</sup> Faculty of Chemistry, University of Bialystok, Ciolkowskiego 1K, 15-245 Bialystok, Poland

<sup>4</sup> Doctoral School of Exact and Natural Science, University of Bialystok, Ciolkowskiego 1K, 15-245 Bialystok, Poland

\* Correspondence: katarzyna.niemirowicz@umb.edu.pl

† These authors contributed equally to this work.

## Table of content

|                                                                                                                                                                                                                             |     |
|-----------------------------------------------------------------------------------------------------------------------------------------------------------------------------------------------------------------------------|-----|
| Table S1. Details of P-(1-3) polymers synthesis. ....                                                                                                                                                                       | 2   |
| Table S2. Details of PT-(1-3) polymers synthesis. ....                                                                                                                                                                      | 2   |
| Table S3. Details of PTF-(1-3) polymers synthesis. ....                                                                                                                                                                     | 2   |
| Table S4. Thermal properties of the polymers. ....                                                                                                                                                                          | 3   |
| Table S5. Calculations of content of folic acid ....                                                                                                                                                                        | 3   |
| Figure S1. <sup>1</sup> H NMR spectrum of exemplary PHEA polymer, P-1, in DMSO- <i>d</i> <sub>6</sub> . ....                                                                                                                | 4   |
| Figure S2. <sup>1</sup> H NMR spectrum of exemplary PHEA- <i>b</i> -NIPAAm polymer, PT-1, in DMSO- <i>d</i> <sub>6</sub> . ....                                                                                             | 5   |
| Figure S3. <sup>1</sup> H NMR spectrum of exemplary P[HEA-FA)- <i>ran</i> -(HEA)]- <i>b</i> -P(NIPAAm) polymer, PTF-1, in DMSO- <i>d</i> <sub>6</sub> . ....                                                                | 5   |
| Figure S4. The juxtaposition of ATR-FT IR, and folic acid (magnification of the region below 1900 cm <sup>-1</sup> ) – left, and FT IR (in CHCl <sub>3</sub> ) – right – spectra of PT-2, PTF-2, PT-3, PTF-3 polymers. .... | 5   |
| Figure S5. UV-Vis spectra of PHEA- <i>b</i> -PNIPAAm polymers, PT-(1-3), in conc. 0.2 mg·mL <sup>-1</sup> in deionized water at 25 °C. ....                                                                                 | 6   |
| Figure S6. UV-Vis spectra of PTF-1, PTF-2, and PTF-3 polymers in conc. 0.2 mg·mL <sup>-1</sup> in deionized water at 25 °C. ....                                                                                            | 6   |
| Figure S7. Normalized SEC-RI traces (A, C) and SEC-UV traces (B, D) of PHEA, PHEA- <i>b</i> -PNIPAAm, and P[(HEA-FA)- <i>ran</i> -(HEA)]- <i>b</i> -PNIPAAm polymers. ....                                                  | 6   |
| Figure S8-10. TG curves (top panel) and DTG curves (bottom panel) of P-3, PT-3, and PTF-3. ....                                                                                                                             | 7-8 |
| Figure S11. MADLS (size by number) measurements data of prepared polymers, PT-(1-3) and PTF-(1-3), with or without presence of 5-FU. ....                                                                                   | 9   |
| Figure S12. TEM images of polymers modified with folic acid. ....                                                                                                                                                           | 9   |

**Table S1.** Details of **P-(1-3)** polymers synthesis.

| Product    | CTA |             |           | HEA  |             |           | AIBN |             |           | THF<br>(mL) | Conv <sup>a</sup><br>(%) | M <sub>n</sub> , NMR <sup>a</sup><br>(g·mol <sup>-1</sup> ) | M <sub>n</sub> , th<br>(g·mol <sup>-1</sup> ) |
|------------|-----|-------------|-----------|------|-------------|-----------|------|-------------|-----------|-------------|--------------------------|-------------------------------------------------------------|-----------------------------------------------|
|            | Eq  | n<br>(mmol) | m<br>(mg) | Eq   | n<br>(mmol) | V<br>(mL) | Eq   | n<br>(mmol) | m<br>(mg) |             |                          |                                                             |                                               |
| <b>P-1</b> | 1.0 | 2.0         | 416.6     | 22.4 | 44.8        | 5.15      | 0.1  | 0.2         | 32.8      | 10.0        | 96.0                     | 3500.0                                                      | 2707.5                                        |
| <b>P-2</b> | 1.0 | 1.0         | 208.3     | 44.8 | 44.8        | 5.15      | 0.1  | 0.1         | 16.4      | 10.0        | 98.0                     | 5800.0                                                      | 5218.6                                        |
| <b>P-3</b> | 1.0 | 0.5         | 104.2     | 89.6 | 44.8        | 5.15      | 0.1  | 0.0         | 8.2       | 10.0        | 97.0                     | 8700.0                                                      | 10209.2                                       |

<sup>a</sup>Determined by <sup>1</sup>H NMR.**Table S2.** Details of **PT-(1-3)** polymers synthesis.

| Product     | PHEA       |     |             |           | NIPAAm |             |       | AIBN |             |           | THF<br>(mL) | Conv <sup>a</sup><br>(%) | M <sub>n</sub> , th<br>(g·mol <sup>-1</sup> ) |
|-------------|------------|-----|-------------|-----------|--------|-------------|-------|------|-------------|-----------|-------------|--------------------------|-----------------------------------------------|
|             | Substrate  | Eq  | n<br>(mmol) | m<br>(mg) | Eq     | n<br>(mmol) | m (g) | Eq   | n<br>(mmol) | m<br>(mg) |             |                          |                                               |
| <b>PT-1</b> | <b>P-1</b> | 1.0 | 0.14        | 370.8     | 64.5   | 8.84        | 1.0   | 0.01 | 0.001       | 0.16      | 4.5         | 89.0                     | 9206.1                                        |
| <b>PT-2</b> | <b>P-2</b> | 1.0 | 0.12        | 600.8     | 76.8   | 8.84        | 1.0   | 0.01 | 0.001       | 0.16      | 4.5         | 85.0                     | 12601.9                                       |
| <b>PT-3</b> | <b>P-3</b> | 1.0 | 0.09        | 890.8     | 101.3  | 8.84        | 1.0   | 0.01 | 0.001       | 0.16      | 4.5         | 82.0                     | 19607.0                                       |

<sup>a</sup>Determined by <sup>1</sup>H NMR.**Table S3.** Details of **PTF-(1-3)** polymers synthesis.

| Product | PHEA- <i>b</i> -PNIPAAm |     |             |           | FA   |             |           | DCC  |             |           | DMAP |             |           | DMSO<br>(mL) | Conv <sup>th</sup><br>(%) | M <sub>n</sub> , <sup>th</sup><br>(g·mol <sup>-1</sup> ) |
|---------|-------------------------|-----|-------------|-----------|------|-------------|-----------|------|-------------|-----------|------|-------------|-----------|--------------|---------------------------|----------------------------------------------------------|
|         | Sub-<br>strate          | Eq  | n<br>(mmol) | m<br>(mg) | Eq   | n<br>(mmol) | m<br>(mg) | Eq   | n<br>(mmol) | m<br>(mg) | Eq   | n<br>(mmol) | m<br>(mg) |              |                           |                                                          |
| PTF-1   | PT-1                    | 1.0 | 0.033       | 300.0     | 10.2 | 0.331       | 146.3     | 11.1 | 0.362       | 74.6      | 1.1  | 0.036       | 4.4       | 6.0          | 100.0                     | 13695.5                                                  |
| PTF-2   | PT-2                    | 1.0 | 0.024       | 300.0     | 11.9 | 0.283       | 124.7     | 13.0 | 0.311       | 64.1      | 1.3  | 0.031       | 3.8       | 6.0          | 100.0                     | 17840.0                                                  |
| PTF-3   | PT-3                    | 1.0 | 0.015       | 300.0     | 15.6 | 0.239       | 105.5     | 17.2 | 0.263       | 54.3      | 1.7  | 0.026       | 3.2       | 6.0          | 100.0                     | 26502.1                                                  |

<sup>a</sup>Determined by <sup>1</sup>H NMR.

**Table S4.** Thermal properties of the polymers.

| Sample ID | Maximum of the degradation rate<br>(°C) | Residue at 800 °C<br>(%) | T <sub>g</sub> <sup>a</sup><br>(°C) |
|-----------|-----------------------------------------|--------------------------|-------------------------------------|
| P-1       | 440                                     | 5.1                      | -2.1                                |
| P-2       | 440                                     | 4.8                      | -3.3                                |
| P-3       | 440                                     | 5.6                      | -5.3                                |
| PT-1      | 415                                     | 3.7                      | 82.0                                |
| PT-2      | 415                                     | 2.8                      | 94.0                                |
| PT-3      | 415                                     | 4.2                      | 83.2                                |
| PTF-1     | 405                                     | 5.3                      | 119.1                               |
| PTF-2     | 405                                     | 7.4                      | 108.2                               |
| PTF-3     | 410                                     | 7.1                      | 103.5                               |
| PTF-1_5FU | 395                                     | 7.9                      | -                                   |
| 5FU       | 310                                     | 5.4                      | -                                   |

<sup>a</sup>Determined by DSC from the second heating run performed with a heating rate of 10 °C·min<sup>-1</sup>.

**Table S5.** Calculations of content of folic acid.

|       | A (y) <sup>a</sup> | c <sub>polymer</sub> (mg·mL <sup>-1</sup> ) | c <sub>FA</sub> (mg·mL <sup>-1</sup> ) (x) <sup>b</sup> | %wt (%) <sup>c</sup> |
|-------|--------------------|---------------------------------------------|---------------------------------------------------------|----------------------|
| PTF-1 | 1.04               | 0.2                                         | 0.0193                                                  | 9.65                 |
| PTF-2 | 1                  | 0.2                                         | 0.0185                                                  | 9.23                 |
| PTF-3 | 0.84               | 0.2                                         | 0.0151                                                  | 7.56                 |

<sup>a</sup> Maximum absorbance taken from UV-Vis spectra of polymers in conc. c<sub>polymer</sub> in deionized water at 25 °C.

<sup>b</sup> Concentration of folic acid calculated from calibration curve of folic acid in H<sub>2</sub>O (y = 0.048 x + 0.114).

<sup>c</sup> %wt = (c<sub>polymer</sub> : c<sub>FA</sub>) · 100%

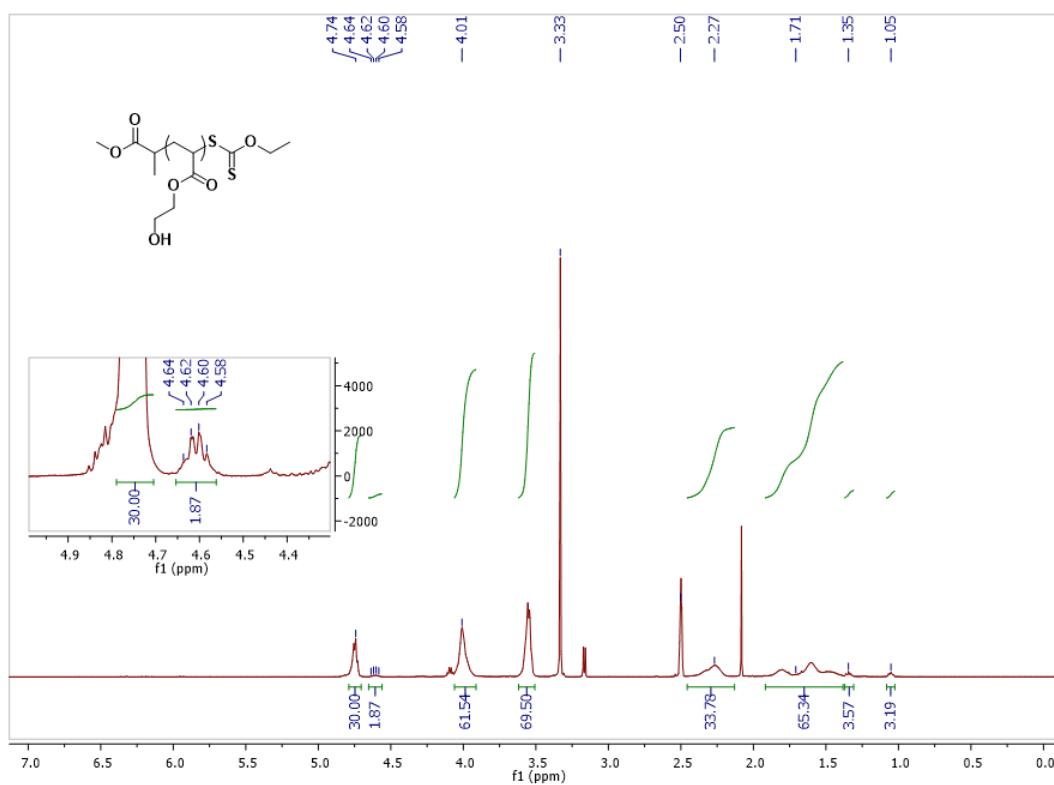

**Figure S1.**  $^1\text{H}$  NMR spectrum of exemplary PHEA polymer, **P-1**, in  $\text{DMSO-}d_6$ .

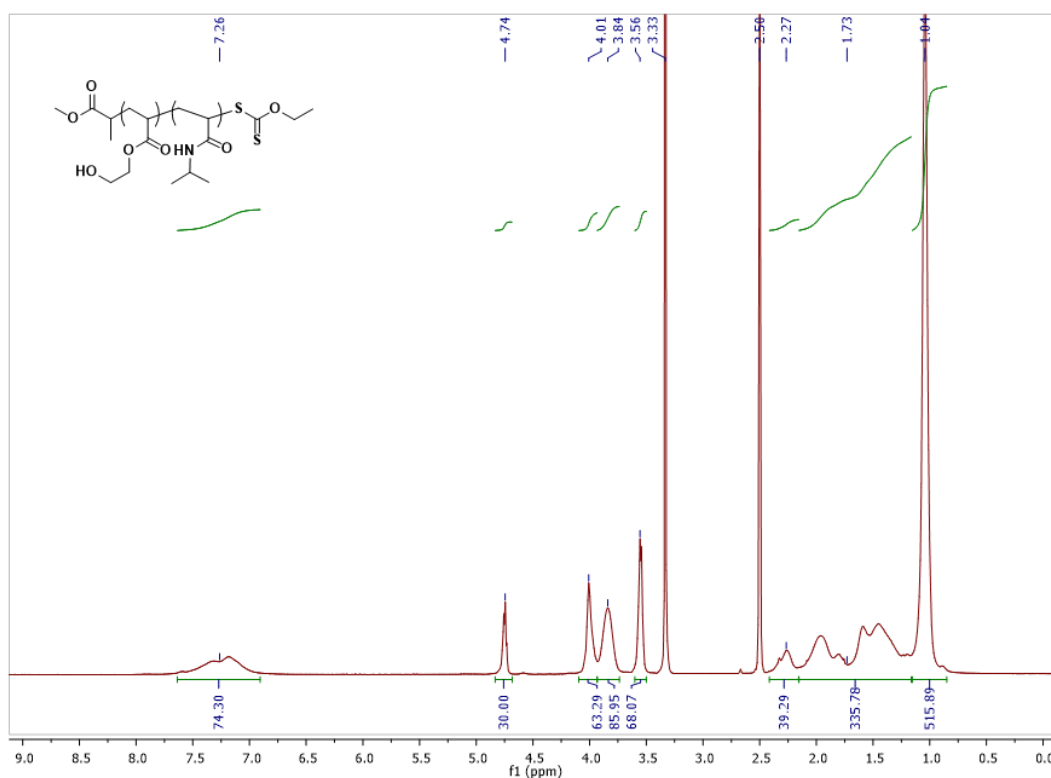

**Figure S2.**  $^1\text{H}$  NMR spectrum of exemplary PHEA-*b*-PNIPAAm polymer, **PT-1**, in  $\text{DMSO-}d_6$ .

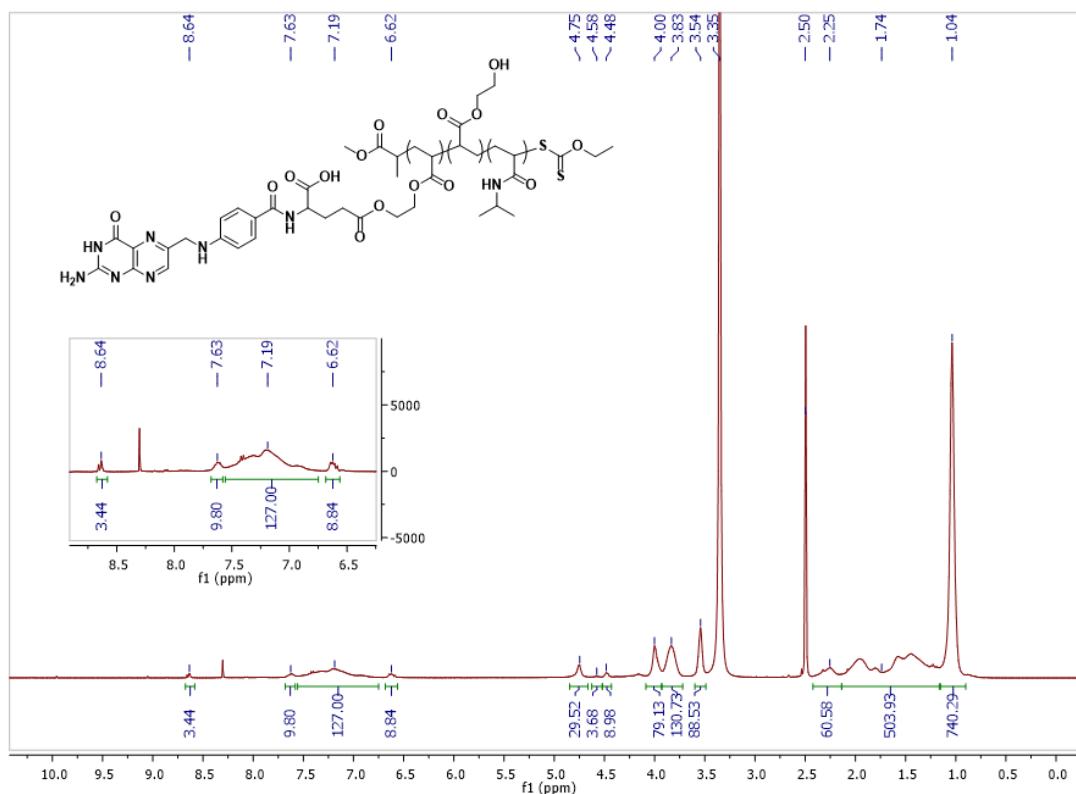

**Figure S3.**  $^1\text{H}$  NMR spectrum of exemplary P[HEA-FA)-*ran*-(HEA))-*b*-P(NIPAAm) polymer, **PTF-1**, in DMSO- $d_6$ .

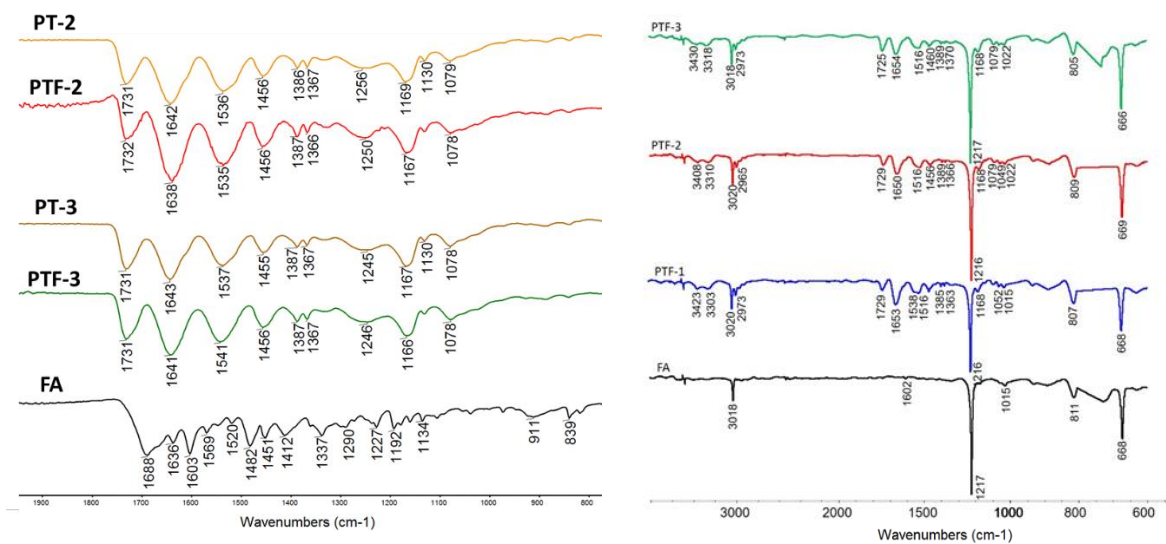

**Figure S4.** The juxtaposition of ATR-FT IR, and folic acid (magnification of the region below  $1900\text{ cm}^{-1}$ ) – left, and FT IR (in  $\text{CHCl}_3$ ) – right – spectra of **PT-2**, **PTF-2**, **PT-3**, **PTF-3** polymers.

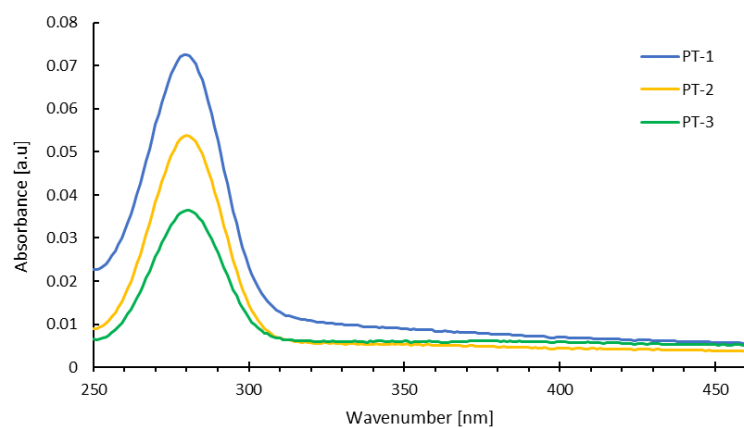

**Figure S5.** UV-Vis spectra of PHEA-*b*-PNIPAAm polymers, **PT-(1-3)**, in conc. 0.2 mg·mL<sup>-1</sup> in deionized water at 25 °C.

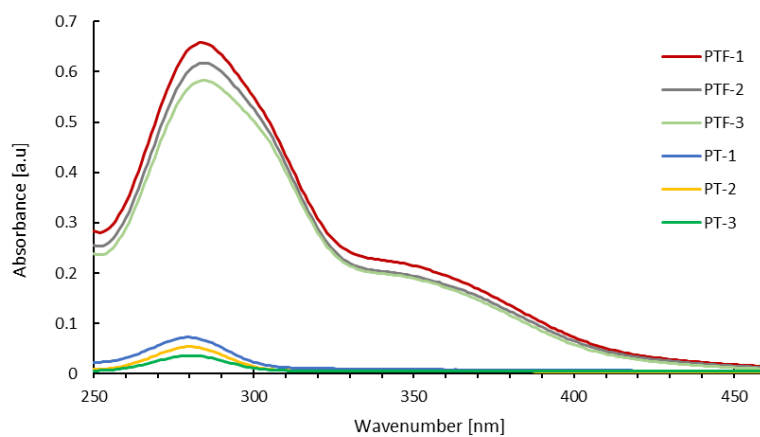

**Figure S6.** UV-Vis spectra of PT-1, PT-2, PT-3, PTF-1, PTF-2, and PTF-3 polymers in conc. 0.2 mg·mL<sup>-1</sup> in deionized water at 25 °C.

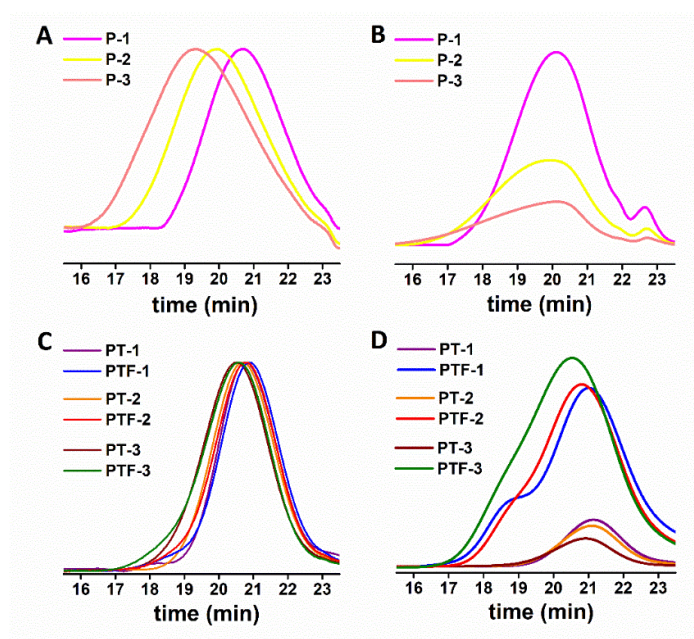

**Figure S7.** Normalized SEC-RI traces (A, C) and SEC-UV traces (B, D) of PHEA, PHEA-*b*-PNIPAAm, and P[(HEA-FA)-*ran*-(HEA)]-*b*-PNIPAAm polymers.

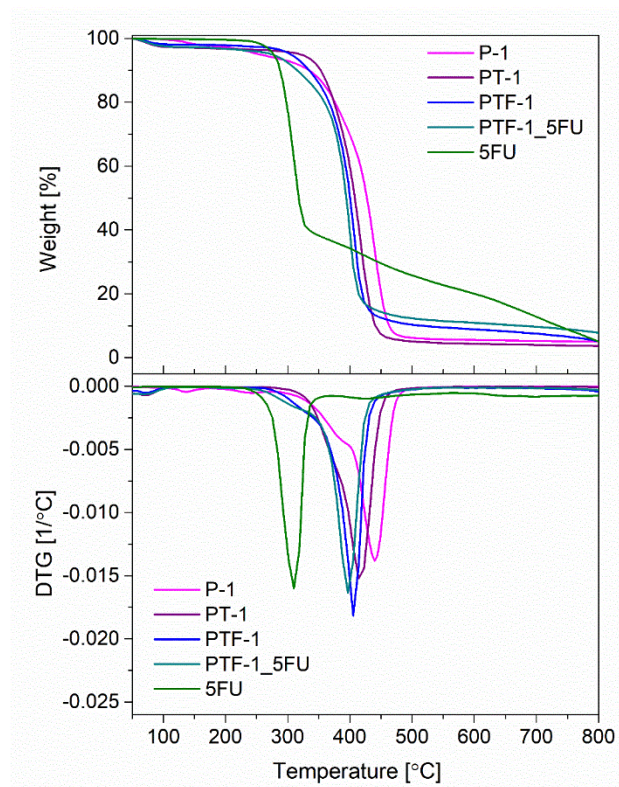

**Figure S8.** TG curves (top panel) and DTG curves (bottom panel) of **P-1**, **PT-1**, **PTF-1**, **PTF-1** with 5-FU, and 5-FU.

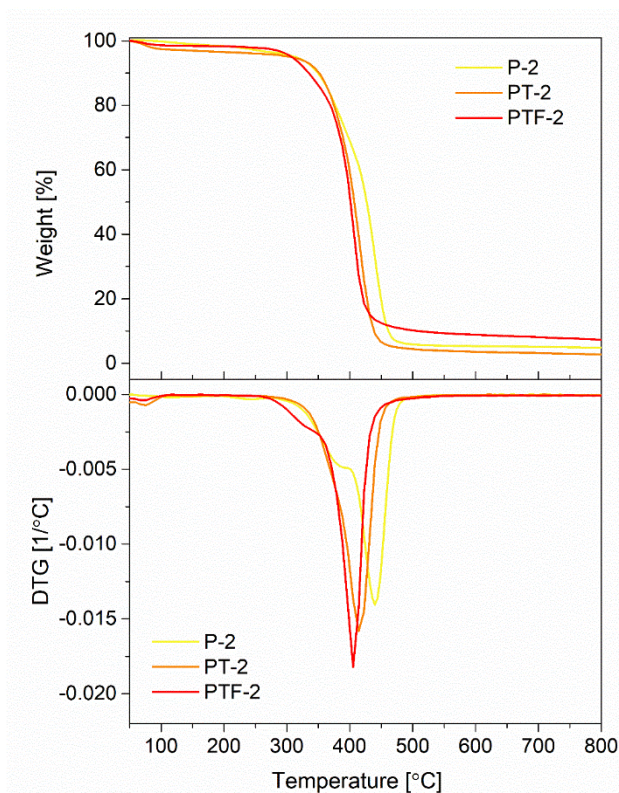

**Figure S9.** TG curves (top panel) and DTG curves (bottom panel) of **P-2**, **PT-2**, and **PTF-2**.



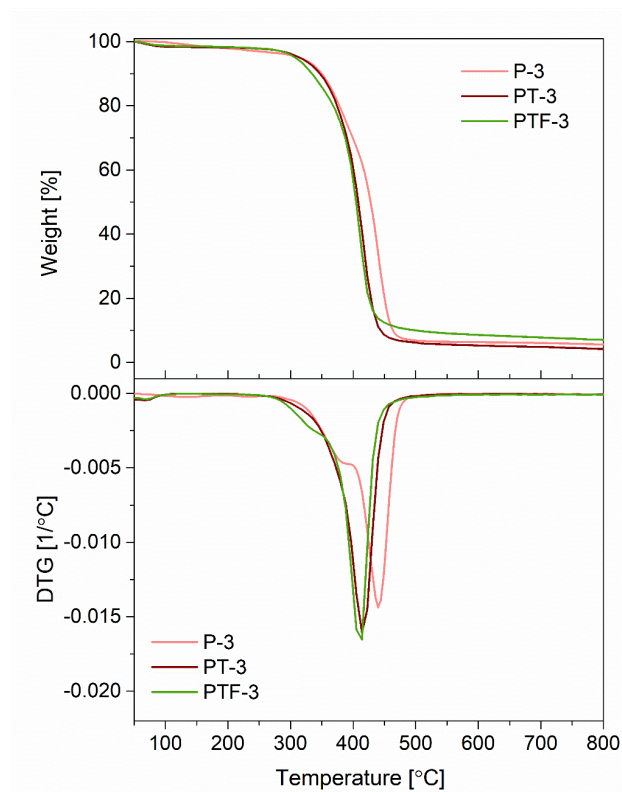

**Figure S10.** TG curves (top panel) and DTG curves (bottom panel) of **P-3**, **PT-3**, and **PTF-3**.



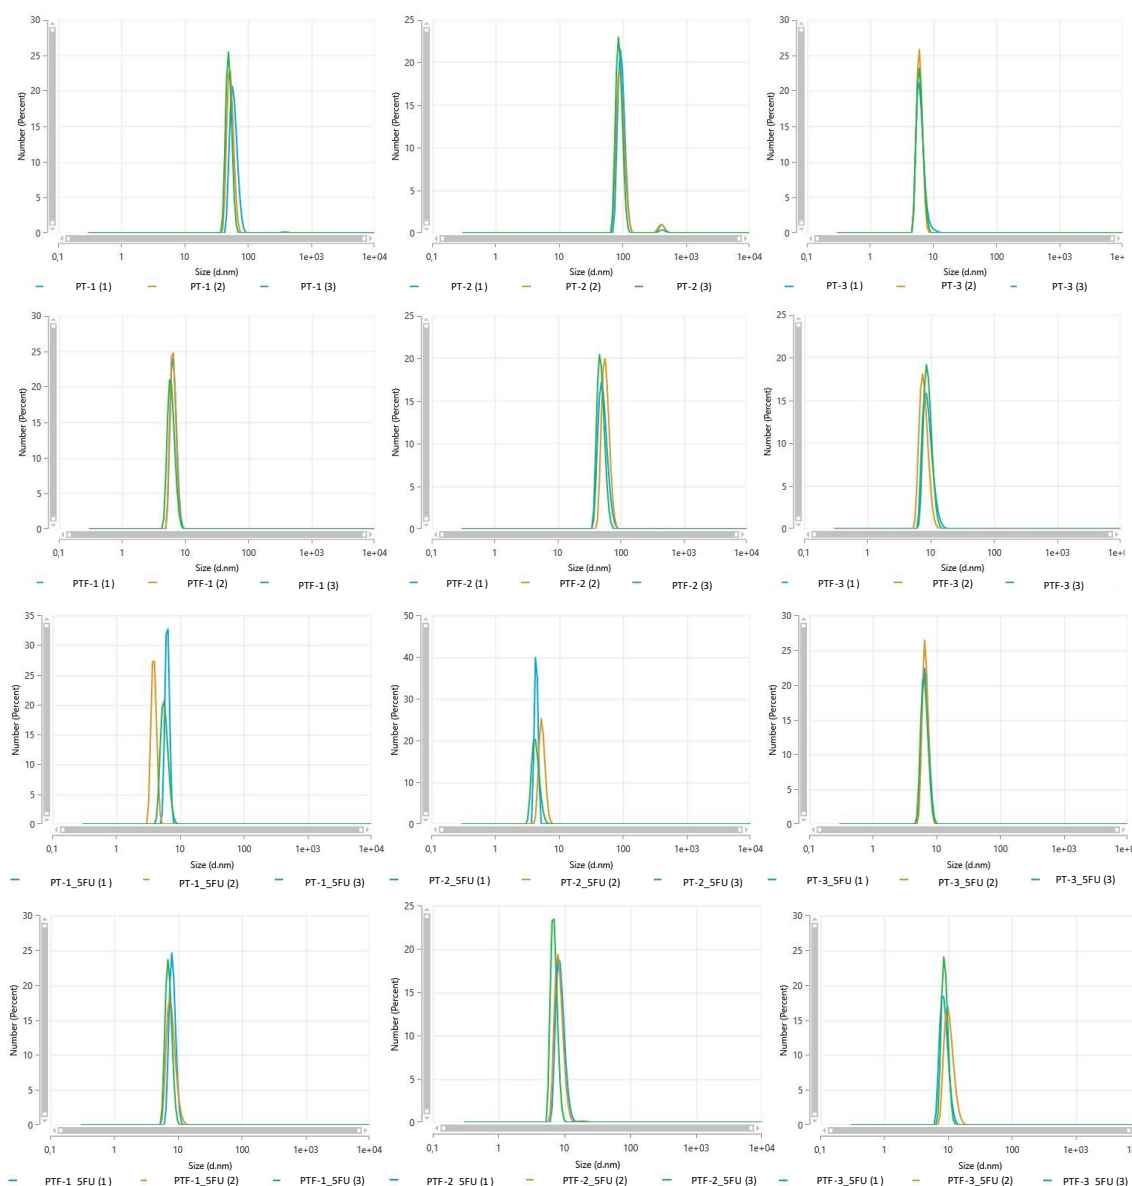

**Figure S11.** MADLS (size by number) measurements data of prepared polymers, **PT-(1-3)** and **PTF-(1-3)**, with or without presence of 5-FU.

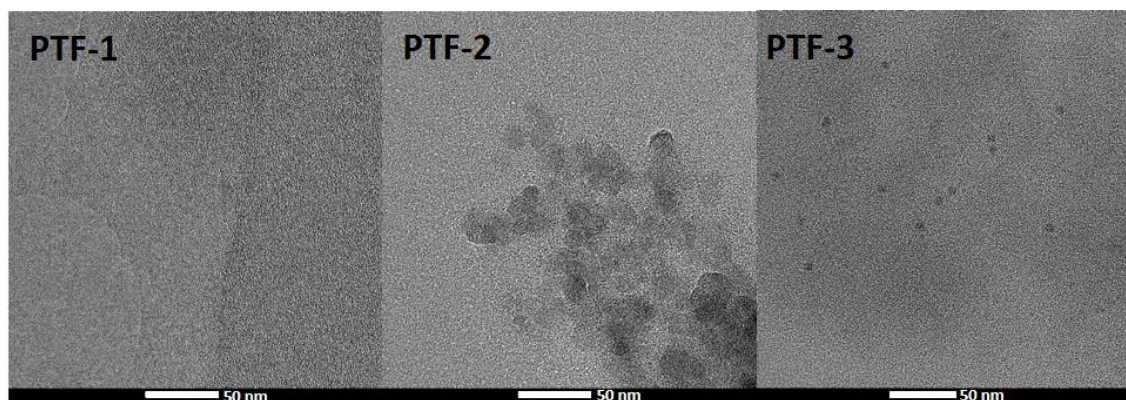

**Figure S12.** TEM images of polymers modified with folic acid.
